# Supplementary material
Source: PubMed Central journal article supplement (PMC2681181)
Supplement: NIHMS100973-supplement-supplement_1.pdf [file NIHMS100973-supplement-supplement_1.pdf]

**Figure 4 and 5** Real-time polymerase chain reaction with SYBR Green master mix were used to quantify the expression levels of 84 genes ontologically related and regulated by TGF $\beta$ /BMP Signalling pathway, or the 84 genes of Signal Transduction Pathway Finder specific arrays (SA Biosciences, Frederick, MD). The heat-map shows absolute mRNA copy numbers which were calculated from PCR cycle thresholds (Cts, Fig. 4). For example, on the color coded log<sub>2</sub> scale, a value of 10 represents 2<sup>10</sup> or 1024 transcripts. Two endogenous controls, GAPDH and ACTB, were used for normalization. Functional gene clustering (with major groups according to the array manual) indicated at right. In the Signal Transduction Pathway Finder Array (Fig. 5), the fold expression differences were analyzed through the SA Biosciences webpage, then transferred into MATLAB and visualized with the Bioinformatics Toolbox Clustergram function. All experiments were run in triplicates.

**Figure 6** Parallel triplicate experiments were plated and synchronized as described in the Material and Methods section. A-083-01 (5 $\mu$ M) pre-treatment were used (30 minutes) on selected samples followed by LAM and TGF $\beta$ 1 exposure alone and in combination with the inhibitor. Samples were harvested after 4-hour incubation to enhance the stable expressional profile changes. Selected genes were assayed on cDNA library generated (Materials and Methods) by ABI TaqMan probes (Supplemental Table 2) on ABI 7900 HT Fast Real Time QPCR instrument. The results were transferred to Excel (Microsoft) and graphed with error bars generated by standard deviation of Ct values from the three independent experiments.

**Supplemental Material:** The plate is normalized to the average of 5 house-keeping genes B2M, HPRT1, RPL13A, GAPGH, and ACTB. The p=0.001 and below was considered highly significant. From the original description and functional grouping of product specification sheet four groups

were created by combining the Transcription Factors and Regulators (group 4, 21 genes) with the Genes Involving in Cellular and Developmental Processes (group 5, 28 genes).

The Venn analysis was performed through (<http://www.pangloss.com/seidel/Protocols/venn4.cgi>) site. The generated group lists (Supplemental Table 1) were used to create the figure (Supplemental Fig. 1) in which genes are represented by squares, grouped according to their function and coloured according to their expression levels in MCF-7 as compared to MCF-10A.

The SuperArray (SA) results were validated with individual TaqMan assays designed against selective targets from the same cDNA pools that were used to generate the array data sets (Supplemental Table 2). Expressional fold changes are shown. From the total of 33 validated genes, 11 presented. The TaqMan data considered more accurate, because of specifically targeted assays vs. the less sensitive SYBR Green detection system/chemistry employed in Super Arrays. The difference between the two systems is greater when expressional changes are higher. Some of the genes are not analyzed in all experiments (N/A) due to depletion of representative cDNA archives.

# Gene Expressional Differences in MCF-7 vs. MCF-10A cells, Venn Groups

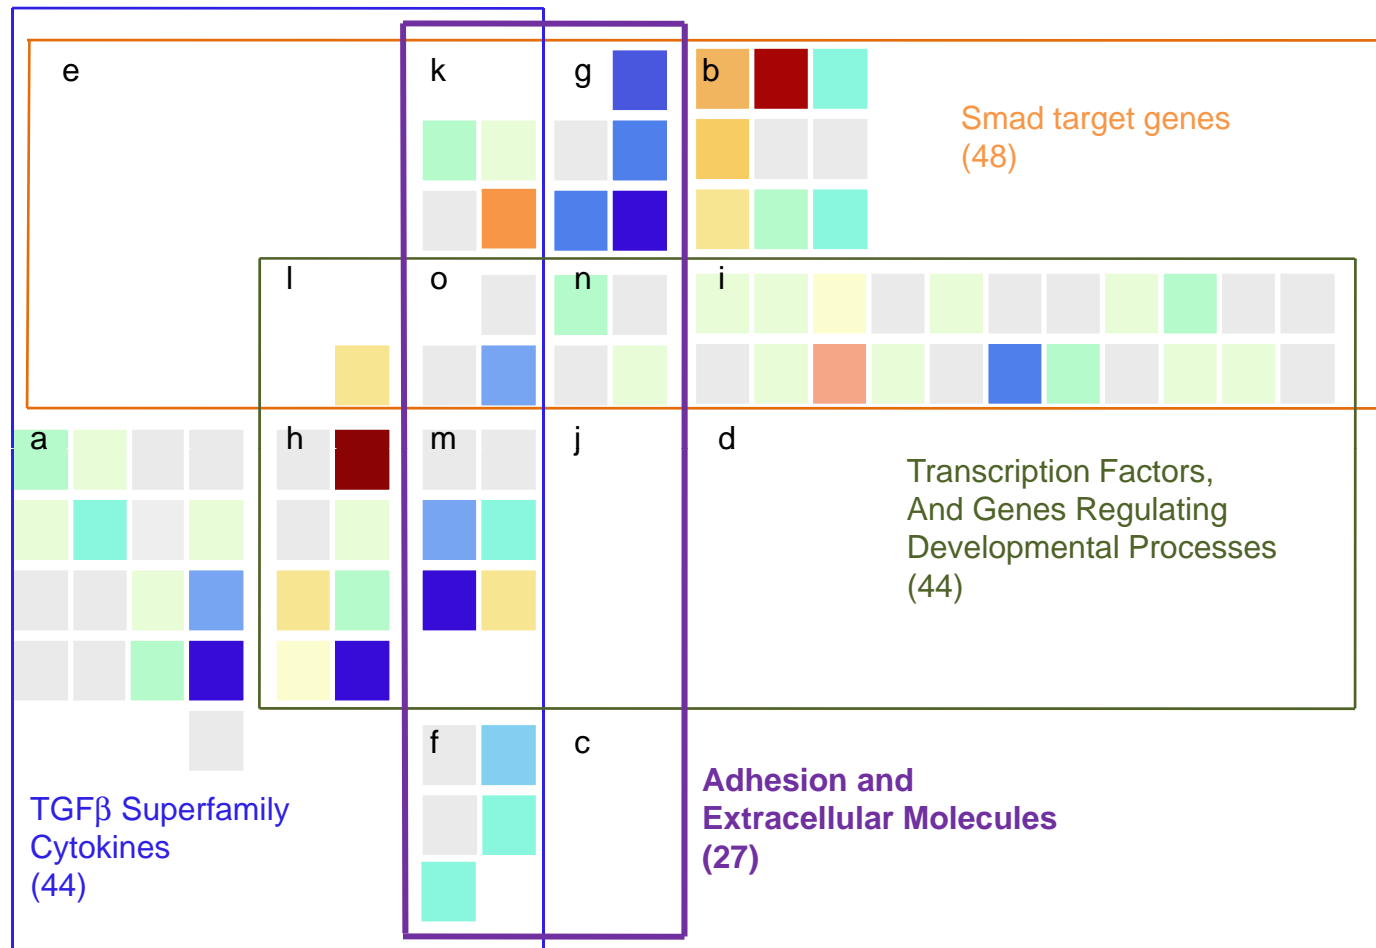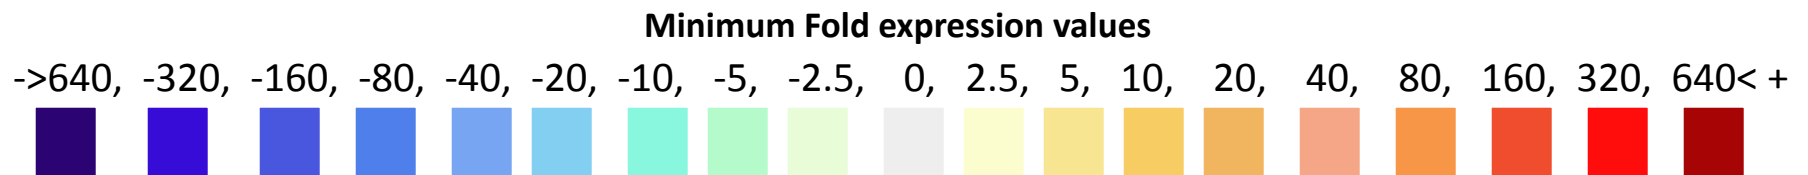

Supplemental Table 1.

Change of Basal Gene Expressional values in MCF-7 as compared to MCF-10A cell line.

| Gene # /Position    | GeneBank     | Symbol   | Fold Up/Down Regulation | T-test p-Value | Description                                                                                   |
|---------------------|--------------|----------|-------------------------|----------------|-----------------------------------------------------------------------------------------------|
| <b>Venn Group a</b> |              |          |                         |                |                                                                                               |
| 01 /A01             | NM_001105    | ACVR1    | -4.96                   | 0.0000         | Activin A receptor, type I                                                                    |
| 02 /A02             | NM_001616    | ACVR2A   | -2.62                   | 0.0007         | Activin A receptor, type IIA                                                                  |
| 03 /A03             | NM_000020    | ACVRL1   | -1.25                   | 0.7013         | Activin A receptor type II-like 1                                                             |
| 05 /A05             | NM_020547    | AMHR2    | 1.08                    | 0.8043         | Anti-Mullerian hormone receptor, type II                                                      |
| 16 /B04             | NM_004329    | BMPR1A   | -2.40                   | 0.0011         | Bone morphogenetic protein receptor, type IA                                                  |
| 17 /B05             | NM_001203    | BMPR1B   | -7.37                   | 0.0000         | Bone morphogenetic protein receptor, type IB                                                  |
| 36 /C12             | NM_000557    | GDF5     | -1.38                   | 0.4911         | Growth differentiation factor 5 (cartilage-derived morphogenetic protein-1)                   |
| 37 /D01             | NM_001001557 | GDF6     | 1.12                    | 0.9002         | Growth differentiation factor 6                                                               |
| 38 /D02             | NM_182828    | GDF7     | -1.52                   | 0.4995         | Growth differentiation factor 7                                                               |
| 53 /E05             | NM_020997    | LEFTY1   | -1.76                   | 0.0529         | Left-right determination factor 1                                                             |
| 59 /E11             | NM_018055    | NODAL    | -3.62                   | 0.1290         | Nodal homolog (mouse)                                                                         |
| 77 /G05             | NM_003238    | TGFB2    | -4.52                   | 0.0566         | Transforming growth factor, beta 2                                                            |
| 78 /G06             | NM_003239    | TGFB3    | -1.12                   | 0.2902         | Transforming growth factor, beta 3                                                            |
| 80 /G08             | NM_004612    | TGFBR1   | -2.53                   | 0.0000         | Transforming growth factor, beta receptor I (activin A receptor type II-like kinase, 53kDa)   |
| 81 /G09             | NM_003242    | TGFBR2   | -36.72                  | 0.0001         | Transforming growth factor, beta receptor II (70/80kDa)                                       |
| 82 /G10             | NM_003243    | TGFBR3   | -268.88                 | 0.0000         | Transforming growth factor, beta receptor III (betaglycan, 300kDa)                            |
| 83 /G11             | NM_004257    | TGFBRAP1 | -1.34                   | 0.1339         | Transforming growth factor, beta receptor associated protein 1                                |
| <b>Venn Group b</b> |              |          |                         |                |                                                                                               |
| 06 /A06             | NM_012342    | BAMBI    | 25.26                   | 0.0000         | BMP and activin membrane-bound inhibitor homolog (Xenopus laevis)                             |
| 15 /B03             | NM_133468    | BMPER    | 11.24                   | 0.0000         | BMP binding endothelial regulator                                                             |
| 19 /B07             | NM_001789    | CDC25A   | 5.45                    | 0.0018         | Cell division cycle 25A                                                                       |
| 21 /B09             | NM_004936    | CDKN2B   | 651.26                  | 0.0000         | Cyclin-dependent kinase inhibitor 2B (p15, inhibits CDK4)                                     |
| 22 /B10             | NM_005454    | CER1     | -1.68                   | 0.4798         | Cerberus 1, cysteine knot superfamily, homolog (Xenopus laevis)                               |
| 27 /C03             | NM_000099    | CST3     | -4.81                   | 0.0010         | Cystatin C (amyloid angiopathy and cerebral hemorrhage)                                       |
| 31 /C07             | NM_004116    | FKBP1B   | -14.45                  | 0.0001         | FK506 binding protein 1B, 12.6 kDa                                                            |
| 42 /D06             | NM_002166    | ID2      | 1.08                    | 0.5613         | Inhibitor of DNA binding 2, dominant negative helix-loop-helix protein                        |
| 58 /E10             | NM_005380    | NBL1     | -13.16                  | 0.0000         | Neuroblastoma, suppression of tumorigenicity 1                                                |
| <b>Venn Group f</b> |              |          |                         |                |                                                                                               |
| 34 /C10             | NM_016204    | GDF2     | -1.27                   | 0.6842         | Growth differentiation factor 2                                                               |
| 35 /C11             | NM_020634    | GDF3     | 1.10                    | 0.8533         | Growth differentiation factor 3                                                               |
| 54 /E06             | NM_000627    | LTBP1    | -9.20                   | 0.0000         | Latent transforming growth factor beta binding protein 1                                      |
| 55 /E07             | NM_000428    | LTBP2    | -16.70                  | 0.0003         | Latent transforming growth factor beta binding protein 2                                      |
| 56 /E08             | NM_003573    | LTBP4    | -7.69                   | 0.0000         | Latent transforming growth factor beta binding protein 4                                      |
| <b>Venn Group g</b> |              |          |                         |                |                                                                                               |
| 26 /C02             | NM_000090    | COL3A1   | 19.06                   | 0.0116         | Collagen, type III, alpha 1 (Ehlers-Danlos syndrome type IV, autosomal dominant)              |
| 29 /C05             | NM_000118    | ENG      | -76.91                  | 0.0000         | Endoglin (Osler-Rendu-Weber syndrome 1)                                                       |
| 63 /F03             | NM_002658    | PLAU     | -163.80                 | 0.0000         | Plasminogen activator, urokinase                                                              |
| 65 /F05             | NM_000602    | SERPINE1 | -48.87                  | 0.0004         | Serpin peptidase inhibitor, clade E (nexin, plasminogen activator inhibitor type 1), member 1 |
| 79 /G07             | NM_000358    | TGFBI    | -246.19                 | 0.0000         | Transforming growth factor, beta-induced, 68kDa                                               |

### Venn Group h

|         |           |       |         |        |                                                                        |
|---------|-----------|-------|---------|--------|------------------------------------------------------------------------|
|         | NM_001201 | BMP3  | 1.12    | 0.7571 | Bone morphogenetic protein 3 (osteogenic)                              |
| 10 /A10 |           |       |         |        |                                                                        |
| 11 /A11 | NM_130851 | BMP4  | 1.19    | 0.2907 | Bone morphogenetic protein 4                                           |
| 12 /A12 | NM_021073 | BMP5  | 4.80    | 0.5417 | Bone morphogenetic protein 5                                           |
| 13 /B01 | NM_001718 | BMP6  | 2.82    | 0.0201 | Bone morphogenetic protein 6                                           |
| 14 /B02 | NM_001719 | BMP7  | 2234.86 | 0.0000 | Bone morphogenetic protein 7 (osteogenic protein 1)                    |
| 18 /B06 | NM_001204 | BMPR2 | -3.38   | 0.0003 | Bone morphogenetic protein receptor, type II (serine/threonine kinase) |
| 61 /F01 | NM_000475 | NR0B1 | -5.73   | 0.0319 | Nuclear receptor subfamily 0, group B, member 1                        |
| 74 /G02 | NM_000660 | TGFB1 | -1.38   | 0.0509 | Transforming growth factor, beta 1 (Camurati-Engelmann disease)        |

### Venn Group i

|         |           |         |        |        |                                                                               |
|---------|-----------|---------|--------|--------|-------------------------------------------------------------------------------|
|         | NM_000389 | CDKN1A  | -2.26  | 0.0000 | Cyclin-dependent kinase inhibitor 1A (p21, Cip1)                              |
| 20 /B08 |           |         |        |        |                                                                               |
| 23 /B11 | NM_003741 | CHRD    | 1.84   | 0.0371 | Chordin                                                                       |
| 28 /C04 | NM_004405 | DLX2    | -2.03  | 0.0308 | Distal-less homeobox 2                                                        |
| 30 /C06 | NM_005241 | EV11    | -2.15  | 0.1681 | Ecotropic viral integration site 1                                            |
| 32 /C08 | NM_005252 | FOS     | 2.08   | 0.0136 | V-fos FBJ murine osteosarcoma viral oncogene homolog                          |
| 39 /D03 | NM_173849 | GSC     | 43.78  | 0.0005 | Goosecoid                                                                     |
| 40 /D04 | NM_022740 | HIPK2   | -1.59  | 0.0486 | Homeodomain interacting protein kinase 2                                      |
| 41 /D05 | NM_002165 | ID1     | -2.84  | 0.0004 | Inhibitor of DNA binding 1, dominant negative helix-loop-helix protein        |
| 51 /E03 | NM_002228 | JUN     | -3.01  | 0.0015 | V-jun sarcoma virus 17 oncogene homolog (avian)                               |
| 52 /E04 | NM_002229 | JUNB    | -1.70  | 0.0223 | Jun B proto-oncogene                                                          |
| 57 /E09 | NM_002467 | MYC     | -1.72  | 0.0030 | V-myc myelocytomatosis viral oncogene homolog (avian)                         |
| 60 /E12 | NM_005450 | NOG     | -90.39 | 0.0000 | Noggin                                                                        |
| 64 /F04 | NM_001754 | RUNX1   | 1.05   | 0.7004 | Runt-related transcription factor 1 (acute myeloid leukemia 1; aml1 oncogene) |
| 66 /F06 | NM_005900 | SMAD1   | -3.95  | 0.0001 | SMAD, mothers against DPP homolog 1 (Drosophila)                              |
| 67 /F07 | NM_005901 | SMAD2   | -3.01  | 0.0001 | SMAD, mothers against DPP homolog 2 (Drosophila)                              |
| 68 /F08 | NM_005902 | SMAD3   | -1.61  | 0.0352 | SMAD, mothers against DPP homolog 3 (Drosophila)                              |
| 69 /F09 | NM_005359 | SMAD4   | -4.54  | 0.0006 | SMAD, mothers against DPP homolog 4 (Drosophila)                              |
| 70 /F10 | NM_005903 | SMAD5   | -3.29  | 0.0001 | SMAD, mothers against DPP homolog 5 (Drosophila)                              |
| 71 /F11 | NM_020429 | SMURF1  | -1.12  | 0.3781 | SMAD specific E3 ubiquitin protein ligase 1                                   |
| 72 /F12 | NM_003107 | SOX4    | -3.16  | 0.0000 | SRY (sex determining region Y)-box 4                                          |
| 84 /G12 | NM_003244 | TGIF    | 1.37   | 0.7693 | TGFB-induced factor (TALE family homeobox)                                    |
| 76 /G04 | NM_006022 | TSC22D1 | -1.30  | 0.0283 | TSC22 domain family, member 1                                                 |

### Venn Group k

|         |           |       |        |        |                                                                                                 |
|---------|-----------|-------|--------|--------|-------------------------------------------------------------------------------------------------|
|         | NM_000600 | IL6   | -4.98  | 0.0118 | Interleukin 6 (interferon, beta 2)                                                              |
| 45 /D09 |           |       |        |        |                                                                                                 |
| 49 /E01 | NM_002213 | ITGB5 | 1.05   | 0.6171 | Integrin, beta 5                                                                                |
| 50 /E02 | NM_000889 | ITGB7 | -2.80  | 0.0009 | Integrin, beta 7                                                                                |
| 62 /F02 | NM_002608 | PDGFB | 115.14 | 0.0000 | Platelet-derived growth factor beta polypeptide (simian sarcoma viral (v-sis) oncogene homolog) |

### Venn Group l

|         |           |       |      |        |                                                           |
|---------|-----------|-------|------|--------|-----------------------------------------------------------|
|         | NM_007315 | STAT1 | 3.78 | 0.0003 | Signal transducer and activator of transcription 1, 91kDa |
| 73 /G01 |           |       |      |        |                                                           |

### Venn Group m

|         |           |       |         |        |                                                           |
|---------|-----------|-------|---------|--------|-----------------------------------------------------------|
|         | NM_000479 | AMH   | -1.08   | 0.3811 | Anti-Mullerian hormone                                    |
| 04 /A04 |           |       |         |        |                                                           |
| 08 /A08 | NM_006129 | BMP1  | -44.45  | 0.0000 | Bone morphogenetic protein 1                              |
| 09 /A09 | NM_001200 | BMP2  | -290.42 | 0.0000 | Bone morphogenetic protein 2                              |
| 46 /D10 | NM_002191 | INHHA | 1.87    | 0.0114 | Inhibin, alpha                                            |
| 47 /D11 | NM_002192 | INHBA | -8.30   | 0.0002 | Inhibin, beta A (activin A, activin AB alpha polypeptide) |
| 48 /D12 | NM_002193 | INHBB | 4.73    | 0.0001 | Inhibin, beta B (activin AB beta polypeptide)             |

### Venn Group n

|         |           |        |       |        |                                                         |
|---------|-----------|--------|-------|--------|---------------------------------------------------------|
|         | NM_199173 | BGLAP  | -3.77 | 0.0001 | Bone gamma-carboxyglutamate (gla) protein (osteocalcin) |
| 07 /A07 |           |        |       |        |                                                         |
| 24 /B12 | NM_000088 | COL1A1 | -1.79 | 0.1686 | Collagen, type I, alpha 1                               |

|         |           |        |              |               |                           |
|---------|-----------|--------|--------------|---------------|---------------------------|
| 25 /C01 | NM_000089 | COL1A2 | -1.47        | <b>0.3629</b> | Collagen, type I, alpha 2 |
| 33 /C09 | NM_006350 | FST    | <b>-2.69</b> | <b>0.0014</b> | Follistatin               |

#### Venn Group o

|         |           |        |               |               |                                                        |
|---------|-----------|--------|---------------|---------------|--------------------------------------------------------|
| 43 /D07 | NM_000618 | IGF1   | -1.34         | 0.6914        | Insulin-like growth factor 1 (somatomedin C)           |
| 44 /D08 | NM_000598 | IGFBP3 | 1.11          | 0.3014        | Insulin-like growth factor binding protein 3           |
| 75 /G03 | NM_015927 | TGFB11 | <b>-37.76</b> | <b>0.0001</b> | Transforming growth factor beta 1 induced transcript 1 |

#### House-keeping gene controls

|     |           |        |              |               |                                                                 |
|-----|-----------|--------|--------------|---------------|-----------------------------------------------------------------|
| H01 | NM_004048 | B2M    | <b>-4.76</b> | <b>0.0000</b> | Beta-2-microglobulin                                            |
| H02 | NM_000194 | HPRT1  | <b>6.57</b>  | <b>0.0003</b> | Hypoxanthine phosphoribosyltransferase 1 (Lesch-Nyhan syndrome) |
| H03 | NM_012423 | RPL13A | <b>-2.08</b> | <b>0.0000</b> | Ribosomal protein L13a                                          |
| H04 | NM_002046 | GAPDH  | -1.10        | 0.3978        | Glyceraldehyde-3-phosphate dehydrogenase                        |
| H05 | NM_001101 | ACTB   | 1.65         | <b>0.0002</b> | Actin, beta                                                     |

The sub-groups that contained no genes (**c, e, j, d in Figure 3**) are not listed.

The significant negative values are blue and the positive change is pink. The relevant p-values are highlighted in red.

**Table 2**

**SuperArray Validation with TaqMan Assay  
(Fold Change)**

| Genes           | MCF-7/MCF-10A<br>Un-treated controls |          | Treatment |        |       |        |         |        |       |        |         |        |       |        |
|-----------------|--------------------------------------|----------|-----------|--------|-------|--------|---------|--------|-------|--------|---------|--------|-------|--------|
|                 |                                      |          | CII       |        |       |        | LAM     |        |       |        | TGFβ    |        |       |        |
|                 |                                      |          | MCF-10A   |        | MCF-7 |        | MCF-10A |        | MCF-7 |        | MCF-10A |        | MCF-7 |        |
|                 |                                      |          | SA        | TaqMan | SA    | TaqMan | SA      | TaqMan | SA    | TaqMan | SA      | TaqMan | SA    | TaqMan |
| <b>BMP2</b>     | -290.42                              | -15.43   | -1.08     | 1.13   | 1.08  | -1.05  | -1.43   | 2.01   | 3.59  | 1.68   | 2.17    | 1.92   | 1.35  | 1.25   |
| <b>BMP7</b>     | 2234.86                              | 32360.94 | 1.10      | 1.59   | 1.02  | 1.22   | 4.33    | 10.59  | 2.43  | 3.28   | -2.35   | -2.01  | 1.16  | 1.84   |
| <b>CDKN2B</b>   | 651.26                               | 10890.94 | 1.37      | 1.03   | -1.05 | 1.08   | 1.20    | -1.02  | -1.35 | 1.68   | 1.12    | 1.05   | 1.51  | 2.24   |
| <b>FST</b>      | -2.69                                | -2.16    | 1.05      | 1.28   | 1.06  | 1.36   | -2.14   | -1.85  | -1.25 | 1.32   | 16.37   | 14.93  | 2.47  | 3.80   |
| <b>SERPINE1</b> | -48.87                               | -14.56   | 1.63      | 1.71   | 1.27  | 1.07   | 13.95   | 16.38  | 5.02  | 4.61   | 120.85  | 118.03 | 7.56  | 10.69  |
| <b>PDGFB</b>    | 115.14                               | 79.71    | 1.32      | N/A    | 1.02  | -1.01  | -2.03   | N/A    | -2.00 | N/A    | -1.60   | N/A    | 1.57  | 1.16   |
| <b>PLAU</b>     | -163.8                               | -12.34   | 2.25      | N/A    | 1.03  | -1.39  | 1.61    | N/A    | -1.34 | N/A    | -1.06   | N/A    | 2.67  | 2.29   |
| <b>TGFBR1</b>   | -2.53                                | -1.44    | -1.21     | N/A    | -1.02 | 1.09   | 2.24    | N/A    | 1.20  | N/A    | 1.46    | N/A    | 1.09  | -1.09  |
| <b>TGFBR2</b>   | -36.72                               | -7.00    | 1.31      | N/A    | -1.01 | N/A    | -2.06   | N/A    | -1.09 | N/A    | -1.81   | N/A    | 1.21  | N/A    |
| <b>TGFBR3</b>   | -268.88                              | -67.21   | 1.09      | N/A    | -1.00 | N/A    | -1.45   | N/A    | 1.74  | N/A    | -3.54   | N/A    | -1.06 | N/A    |
| <b>TGFBI</b>    | -246.19                              | -39.46   | 1.10      | N/A    | 1.06  | N/A    | -1.44   | N/A    | -1.50 | N/A    | 1.36    | N/A    | 1.12  | N/A    |

**TaqMan Probes Used:**

|                 |               |               |               |
|-----------------|---------------|---------------|---------------|
| <b>BMP2</b>     | Hs00154192_m1 | <b>CCND1</b>  | Hs00277039_m1 |
| <b>BMP7</b>     | Hs00233476_m1 | <b>FASN</b>   | Hs00188012_m1 |
| <b>CDKN2B</b>   | Hs00793225_m1 | <b>FN1</b>    | Hs00415006_m1 |
| <b>FST</b>      | Hs00246260_m1 | <b>IGFBP3</b> | Hs00426287_m1 |
| <b>SERPINE1</b> | Hs00167155_m1 | <b>MMP10</b>  | Hs00233987_m1 |
| <b>PDGFB</b>    | Hs00234042_m1 | <b>MYC</b>    | Hs00905030_m1 |
| <b>PLAU</b>     | Hs00170182_m1 | <b>NOG</b>    | Hs00271352_m1 |
| <b>TGFBR1</b>   | Hs00610319_m1 |               |               |
| <b>TGFBR2</b>   | Hs00559661_m1 |               |               |
| <b>TGFBR3</b>   | Hs00234259_m1 |               |               |
| <b>TGFBI</b>    | Hs00165908_m1 |               |               |
